# Supplementary material for: Understanding the Interactions between Small-Scale Fisheries and the Mediterranean Monk Seal Using Fishermen’s Ecological Knowledge
Source: MDPI journal article supplement (doi:10.3390/ani13132164), 2023-06-30
Supplement: s1 [file s1]

**Table S1:** Locations reported with encounters of the Mediterranean monk seal in 2020.

| Location                             | Times Reported | %    | District  |
|--------------------------------------|----------------|------|-----------|
| Aquaculture units, Potamos, Liopetri | 11             | 9.0  | Famagusta |
| Ayia Napa port                       | 23             | 18.9 | Famagusta |
| Ayia Thekli, Sotira                  | 3              | 2.5  | Famagusta |
| Ayia Triada port, Paralimni          | 3              | 2.5  | Famagusta |
| Cape Greco, Ayia Napa                | 2              | 1.6  | Famagusta |
| Cape Pyla, Xylophagou                | 3              | 2.5  | Famagusta |
| Kaminoudia, Paralimni                | 1              | 0.8  | Famagusta |
| Kapparis, Paralimni                  | 3              | 2.5  | Famagusta |
| Kermia, Ayia Napa                    | 3              | 2.5  | Famagusta |
| Konnos, Protaras                     | 1              | 0.8  | Famagusta |
| Kryo Nero, Ayia Napa                 | 3              | 2.5  | Famagusta |
| Makronissos beach, Ayia Napa         | 3              | 2.5  | Famagusta |
| Liani, Xylophagou                    | 2              | 1.6  | Famagusta |
| Paralimni                            | 1              | 0.8  | Famagusta |
| Penera, Paralimni                    | 2              | 1.6  | Famagusta |
| Potamos port, Liopetri               | 2              | 1.6  | Famagusta |
| Sea caves, Ayia Napa                 | 2              | 1.6  | Famagusta |
| Teloni, Liopetri                     | 1              | 0.8  | Famagusta |
| Larnaca port                         | 1              | 0.8  | Larnaca   |
| Petounda, Mazotos                    | 1              | 0.8  | Larnaca   |
| Pharos, Pervolia Larnaca             | 2              | 1.6  | Larnaca   |
| Vasilikos port                       | 1              | 0.8  | Larnaca   |
| Vasilikos Power Station, Zygi        | 2              | 1.6  | Larnaca   |
| Zygi port                            | 1              | 0.8  | Larnaca   |
| Ayios Georgios Alamanou              | 4              | 3.3  | Limassol  |
| Dasoudi beach, Limassol              | 2              | 1.6  | Limassol  |
| Governor's beach, Limassol           | 4              | 3.3  | Limassol  |
| Karnayio, Limassol                   | 2              | 1.6  | Limassol  |
| Limassol Marina                      | 5              | 4.1  | Limassol  |
| Lianokaos, Limassol                  | 1              | 0.8  | Limassol  |
| Moni, Limassol                       | 3              | 2.5  | Limassol  |
| Miramali, Limassol                   | 1              | 0.8  | Limassol  |
| Old port Limassol                    | 3              | 2.5  | Limassol  |
| Pharos, Akrotiri Limassol            | 5              | 4.1  | Limassol  |
| Radar, Akrotiri Limassol             | 2              | 1.6  | Limassol  |
| Anassa, Latsi                        | 4              | 3.3  | Paphos    |
| Cape Arnaoutis, Akamas               | 1              | 0.8  | Paphos    |
| Fontana, Latsi                       | 1              | 0.8  | Paphos    |
| Karavopetres, Paphos                 | 1              | 0.8  | Paphos    |
| Lahania, Petra Romiou, Paphos        | 1              | 0.8  | Paphos    |
| Petra tou Romiou, Paphos             | 1              | 0.8  | Paphos    |
| Potima, Paphos                       | 1              | 0.8  | Paphos    |
| Thalassines spilies, Pegeia          | 3              | 2.5  | Paphos    |
